# Supplementary material for: Multiconfiguration electromagnetic induction survey for paleochannel internal structure imaging: a case study in the alluvial plain of the river Seine, France
Source: Copernicus journal article supplement (doi:10.5194/hess-2017-96), 2017-04-10
Supplement: Supplementary file [file hess-2017-96-AC3-supplement.pdf]

1 Dear reviewers, editors,  
2 Thank you for the very constructive comments. Specific responses to each of the comments are  
3 detailed below, and in particular, concerning 1) the restructuring of the manuscript asked by rev#3  
4 (update of the table of contents) and 2) an enhanced discussion about the water table impact and  
5 hydro-modeling perspective, asked by all reviewers.  
6 The planned modifications have been introduced, and developed when required.  
7 Almost all specific and technical comments have been approved.  
8 Yours sincerely,  
9 The authors

10

11 **Content**

12 **Rev#1** ..... 2  
13 **Rev#2** ..... 4  
14 **Rev#3** ..... 12

15

16

17

## Rev#1

18  
19 *Although this paper has the potential to be a very interesting contribution to Hydrology and Earth*  
20 *System Sciences, I think that the following major issue of concern exists.*

21 *Since the geomorphological context (fluvial paleo-channel) of the survey area and the proximity of the*  
22 *present-day Seine river, it should be expected the presence of the water table hosted in the near-*  
23 *surface porous sediments investigated by the geophysical survey. Actually, this aspect is hardly*  
24 *discussed at all and, since the presence at depth of water hosted in sediments affect the bulk*  
25 *electrical resistivity, it is crucial in for the interpretation of the electrostratigraphic units from ERI in*  
26 *terms of lithology and/or sedimentary facies association and, thus, for the three-layer model adopted*  
27 *all over the site to represent the studied area Considering that the results obtained are very*  
28 *intriguing, I suggest the Author to add a more focused discussion regarding the presence of the water*  
29 *table (or its absence), its depth below ground surface and the chemistry of groundwater (i.e., the*  
30 *electrical conductivity). Alternatively, I suggest the Authors to explicit if this data were available to*  
31 *them (or not) and, if so, how they were considered in the discussion of results. I think that this*  
32 *discussion will greatly improve the scientific value of the results because can help*  
33 *geologist/geophysicist that have to face a similar problem.*

34 *The water table was measured in the last series of auger soundings done in June 2015 (PTA02 to*  
35 *PTA04 and PTA11 to PTA13) during a low water period. The clay infilling is always saturated. The*  
36 *upper topsoil/loam unit is never dry, but its degree of saturation could probably vary from 50% to*  
37 *100% (which is most likely the case during high water periods).*

38 *Because the resistivity of the clays is close to 10-20 Ohm.m, and the water conductivity (measured*  
39 *from a piezometer located 1km apart from the site, is about 640  $\mu\text{S}/\text{cm}$   $\sim$ 15 Ohm.m) the change of*  
40 *the saturation of the topsoil/loam formation ( $\sim$  80 Ohm.m from the half meter spaced ERI) is not*  
41 *sufficient to lower the resistivity down to the level of the clays.*

42 *A qualitative XRD (X-ray Diffraction) experiment has been carried out on an old recovered sample of*  
43 *the clayey infilling, which gives the following results for a geological formation that can be described*  
44 *as a marl:  $\sim$ 60% carbonate,  $\sim$ 20% quartz,  $\sim$ 20% illite/montmorillonite and traces of kaolinite. Even*  
45 *fully saturated, the first decimeters (up to 1 m thickness in the southwestern part of the survey) of*  
46 *the topsoil/loam could not reasonably reach the conductivity level of the clayey formation, and its*  
47 *electromagnetic signature is almost undetectable (considering the configuration of the CMD explorer*  
48 *device) for thicknesses lower than 30 cm.*

49 *We agree: an extended discussion on that aspect should help, and will be proposed in the revised*  
50 *version of the manuscript.*

51

52 *SPECIFIC COMMENTS Minor issues of concern are listed in the following.*

53 *1) When describing ERI Measurement setup, considering the use of 48 channel georesistivity*  
54 *meter and 0.5 and 1 m electrode spacing it is not clear how the procedure of rollalong of*  
55 *resistivity data for subsequent transects was accomplished.*

56 We did not use a classical roll-along sequence. Because each pseudo section was measured in less  
57 than 15mn (multi-channel Syscal Pro from Iris Instrument), we performed successive pseudo sections  
58 with overlaps (half the ERI profile length=24m). Text will be annotated accordingly.

59 2) Apparently, no motivation for defining the topsoil as “resistive” (line 272) is furnished. A  
60 motivation for this could be that the soil is plowed (as it can be seen form aerial view in Fig )?

61 The resistivity/conductivity value for the topsoil is inferred from the half meter spaced ERI,  
62 southwestern part or ERI section in Figure 5). The surface is covered with grass and the logs clearly  
63 indicate the topsoil-loam cover.

64 Text will be annotated to specify that the site was a grassy meadow during the survey and the  
65 weather conditions will be described (sunny weather during all the survey).

#### 66 TECHNICAL CORRECTIONS

67 1) Fig. 3: the location of hand auger drilling are notdisplayed. It can be useful for the reader in order  
68 to facilitate the comparison between data. Will be done.

69 2) Fig. 5: The SW-NE orientation of the ERI transect is not displayed. It can be useful for the reader in  
70 order to facilitate the comparison between data. Will be done.

71 3) Fig. 5bis: it could be useful to represent in the ERI model the location at depth where the auger  
72 soundings achieved by a refusal. Will be done.

73

74

---

75

76 **Rev#2**

77 REVIEW COMMENTS

78 0- OVERALL

79 *I would like to address your approach towards apparent conductivities and electrical conductivity in*  
80 *general. First of all, as both properties are repeated quite often, I would suggest using the*  
81 *abbreviations EC (true) and EC<sub>a</sub> (apparent). Second, the difference between both is often unclear in*  
82 *the presented work. It can't be stressed enough that apparent electrical conductivity (EC<sub>a</sub>; as defined*  
83 *by McNeill (REFERENCE); 'apparent') shouldn't be compared to electrical conductivity (EC; a value of*  
84 *the half-space model; 'true'; retrieved after inversion of EMI data) of the subsurface (see also Figure*  
85 *5).*

86 *Also, the symbols used within the paper should elucidate this difference. At present, you use  $\sigma$  for*  
87 *both EC and EC<sub>a</sub>. I suggest using  $\sigma$  and  $\sigma_a$ , respectively, to avoid confusion and enhance the*  
88 *distinction between both.*

89 **EC and EC<sub>a</sub> will be used in the modified version of the manuscript.**

90 *Be consistent when using abbreviations, and stick to these once defined. You use the abbreviation*  
91 *EMI at the beginning, though later on use the full notation (e.g., L156, L162). **Will be done.***

92 *Some obvious questions arise during reading:*

93 *(1) why use a reference line to calibrate the data where no sampling overlap exists between the two*  
94 *survey modes?*

95 **To be honest, the current ERI/EMI calibration process (Lavoué et al. approach) was not planned; it**  
96 **has been decided afterwards during the processing of the data. A planned reference common line is**  
97 **clearly the best solution, but it is also interesting to illustrate what can be obtained if just crossing**  
98 **lines are available.**

99 *(2) Why use a 3 layered inversion model for the EMI data when the ERI shows 2 layers?*

100 **Throughout the entire "blue" zone (Thickness 1 < 10-20 cm) Fig 8, a two-layer model should have**  
101 **been ok (similar SRMR -standardized root-mean squared residual- values). The 1-meter spaced ERI is**  
102 **mostly located in this blue zone which corresponds to thickness 1 less than 20 cm.**

103 **Nevertheless, we kept a three-layer model because:**

104 **1- the logs clearly showed a distinct layer over the clay infilling (without presuming of their**  
105 **respective contrast of resistivity).**

106 **2- of the specificity of the southwestern part illustrated by the results of the half meter spaced ERI**  
107 **(Figure 5), where the thickness of the resistive top layer above the clay infilling exceeds 1 m.**

108 **We must admit that the question of mixing 2 and 3 layered model over the site was discussed a lot,**  
109 **but not kept (essentially because of 1-, and thanks to 2-). It is clear that the "blue" areas of Figure 8**  
110 **for Thickness 1 correspond to zones where the top resistive layer can be considered as inexistent**  
111 **(from a geophysical point of view, with the resolutions of the method used).**

112 **The text will be slightly modified accordingly to specify this point.**

113

114 *(3) Why is there no comparison of the inverted ERI data to the inverted EMI data?*

115 The comparison is implicit as the ERI results have been set as the reference for the depth of the clay  
116 infilling – substratum interface. EMI results have been scaled and shifted to fit ERI interpretation. It is  
117 the purpose of Fig 5 which actually shows the inverted EMI data with the estimated bottom depth of  
118 the clay infilling (as resistivities were fixed during EMI inversion with the help of the ERI  
119 interpretation).

120 *(additionally: you could include an isosurface indicating the shape of the river? This is ultimately the*  
121 *goal of the presented work, i.e. retrieve the shape/morphology of the river.)*

122 The clay infilling (the conductive formation) is without doubt, associated with the presence “at a  
123 moment” of the river. However, the past evolution of the meanders is very complicate with multiple  
124 crossing and overlapping over time. It is only possible to delineate the clay infilling, and difficult to  
125 retrieve the river shape at a given time from the measurements of the electrical conductivity only. It  
126 would require to link the information obtained from geochemical measurements with geophysical  
127 data which is far from being straightforward from EMI data only. Consequently in the present paper,  
128 we prefer not to draw the isosurface, and rather let Thickness #2 as the lone paleoriver geometrical  
129 information. Text will be annotated accordingly.

## 130 1- INTRODUCTION

131 *L49-51: EMI devices are increasingly used for a large number of near-surface geophysical*  
132 *applications, as a consequence of their ability to produce 2D images of the apparent electrical*  
133 *conductivity,  $\sigma$ , over a large surface.*

134 *This is an example of my previous overall comment. 2D images of ECa ( $\sigma a$ ) are actually spatially*  
135 *lateral maps of the ECa; apparent. 2D cross-sections (inverted) of the EC ( $\sigma$ ) are what is of interest in*  
136 *this article. I would suggest to rephrase this sentence, based on what you exactly mean with this.*

137 “2D images” has been replaced by “mapping”.

138 The focus of this study is to evaluate the reliability of EMI at meso-scale to image globally in 3D, even  
139 if it is interpreted in 1D locally. ERI is not meant for providing 3D image of such “large object”. ERI  
140 and logs are highly recommended as “the best geophysical/direct observations” calibration support  
141 for EMI in this context. Text will be modified accordingly.

142 *L60-63: “This shift can be conveniently represented by a complex number, comprising quadrature and*  
143 *in-phase (respectively, real and imaginary) components, which can be inverted and then interpreted*  
144 *in terms of an apparent conductivity and an apparent depth of investigation (DOI).”*

145 *Should be: (respectively, imaginary and real). The quadrature (or imaginary) and in-phase (or real)*  
146 *components. Will be done.*

147 *After inversion it is the EC (not ECa; example of overall comment) I’m not really sure what you exactly*  
148 *mean with apparent DOI (I now only know that it is opposed to the real, L72). So I assume a specific*  
149 *DOI which you attribute to a certain setup independent of the soil model?*

150 Indeed, “inverted” is misleading in the present context. It will be removed. Here, it’s all about  
151 apparent property and its corresponding DOI.

152 L67-70: "This interpretation relies on the fact that, for a given soil model, one specific apparent DOI is  
153 defined by three device setup parameters: (1) the offset between the transmitter and receiver  
154 magnetic dipole, (2) the orientation of the dipole pair, and (3) the frequency of the transmitter  
155 current oscillations. "

156 I think the fourth setup parameter: (4) instrument elevation or instrument operation height is of great  
157 importance and worth noting as well. Agree. Text will be modified.

158 L78: The word 'typical' should be specified more. E.g., low, non-Ferro... Will be done.

159 L80-84: "In a resistive or highly conductive environment, such as that presented in the present study,  
160 the McNeill equation is no longer valid, and EMI recordings, in particular their in-phase component,  
161 must be interpreted within the specific measurement context, taking all of the physical properties of  
162 the local environment into account."

163 I suggest to list the physical properties (i.e., EC, mag. susc., diel. perm.) instead of mentioning 'all'.  
164 Will be done.

## 165 2- DESCRIPTION OF THE STUDY AREA

166 What were the weather conditions when the measurements took place? Maybe worth to note, as  
167 they could have their influence as well (influence of watertable, moister content). In how many days  
168 or during which period was the survey conducted? This could have its influence on the results later on  
169 (see 2-layered vs 3-layered model).

170 Details concerning the site conditions will be added, as well as a new discussion concerning the  
171 influence of the water table and the hydro-modeling perspective.

172 An EMI survey is fast compared to an ERI survey and can be used to determine the location of the ERI  
173 survey. Was the EMI survey used to determine the location of the ERI survey to incorporate more  
174 lateral variations. If not, why not? In case of calibrating your signal, it is very important to cover as  
175 much as possible of the present variation.

176 It is a wise and usual strategy of prospection to map "quickly" and "roughly" with EMI, before doing  
177 ERI to characterize depth and lateral variations accurately: we totally agree. In the present case, little  
178 time was available for a wide area to be investigated before setting up the ERI section.

179 We define the strategy of prospection from the LiDAR map and the old hand-auger soundings (done  
180 one year before the survey). Actually, we must admit that the EMI/ERI calibration procedure was not  
181 planned, but decided afterwards during the inversion process.

182 L138: this → these these

## 183 3- METHODOLOGY

184 Include instrument survey height here as well. Will be done.

185 L154: ...a reference transect of almost... Will be done

186 *L166-167: Three different offsets were used between the centers of the Tx and the Rx coils, namely:*  
187 *1.48m, 2.82 m and 4.49 m, each corresponding to a distinct DOI.*

188 *I suppose you mean a distinct apparent DOI in this case? Based on each coil separation, without*  
189 *further knowledge of the soil model. Indeed. "apparent" will be added.*

190 *L170: The word attempting makes this sentence sound like you just tried something. Assuming this*  
191 *was done deliberately, I would use another word. "Attempting" will be removed.*

192 *L195-199: "When compared to the analysis achieved using auger soundings, the electrical properties*  
193 *of the topsoil/loam formation appear to be merged with the clayey formation, with the exception of*  
194 *the western portion of the cross-section, which has significant sand and gravel content. This outcome*  
195 *could also be due to the finer spatial resolution of the ERI measurements (electrode spacing of 0.5*  
196 *m)."*

197 *Based on the fact that later on a 3-layer model was used, I assume that the finer spatial resolution is*  
198 *given as the reason why there are only 2 distinct layers in the ERI profile? Maybe add a little*  
199 *information about the sensitivity distribution of the used ERI array setup?*

200 *The array used is a mixed Wenner-Schlumberger (reciprocal configuration in order to allow a strong*  
201 *multi-channel parallelization). Theoretically this configuration has enough sensitivity (Furman et al.,*  
202 *2003; Dhalin and Zhou, 2004). With hindsight, a gradient or multiple gradient array should have*  
203 *probably be more efficient to discriminate the first decimeters with a 1m-spacing.*

204 *Text will be modified accordingly.*

205 *Is it justifiable to calibrate an assumed 3-layer profile with a 2-layered inverted ERI model?*

206 *See previous response to a similar comment of Rev#1 (L95-107 of this reply).*

207 *The inversion of ERI data is also an inversion with parameters and uncertainties. It is unfair to say that*  
208 *this model is 'true'. 'True' will be replaced by 'interpreted'.*

209 *What were the weather conditions when the measurements took place? Maybe worth to note, as*  
210 *they could have their influence as well? Dry and sunny weather all the time during the 3 days*  
211 *campaign. A discussion about the water table impact will be added.*

212 *L205-208: I would suggest to rephrase in a more comprehensive way. The sentence is will be*  
213 *reformulated.*

214 *L227-232: "During the field data acquisition we faced several difficulties that prevent us to do a CMD*  
215 *profile exactly on the reference profile. Actually, the EMI data used for the calibration have been*  
216 *taken from the mapped data closest to the reference profile. This has led to several positioning and*  
217 *alignment errors : 1) the EMI data do not exactly cross the reference profile, 2) the EMI data are*  
218 *irregularly spaced along the ERI profile, and 3) the orientation of the CMD device was not exactly the*  
219 *same, for each measurement retained for the calibration."*

220 *I don't really get why you draw a reference profile on a location where you can't perform a CMD*  
221 *survey. This is the core of the calibration process. Because the present EMI/ERI calibration as*  
222 *developed here, was not planned. (L90-93 of this reply)*

223 Also add the fact that (4) the height above the surface is changing constantly (as you are wearing the  
224 instrument?) for each measurement. Will be done.

225 The changing orientation has a great impact on the calibration as other sensitivity distributions are  
226 constantly used to attain the results.

227 You are naming these errors that are included in the process but do not really assess how to  
228 contribute to the results. What is their impact, is this not too big?

229 It is difficult to assess quantitatively from *in situ* measurements. There are different for each offset.  
230 Apparent conductivities measured are a little bit noisier for the smallest offset, nothing abnormal.  
231 During the campaign, the carriers encountered difficulties to cover the area because of the presence  
232 of dense vegetation; the pitch angle was oscillating of a few degrees at least. Below, two plots show  
233 the theoretical variation of the quadrature part in function of the pitch angle ( $< 10^\circ$ ) for the 1.5 and  
234 2.5 meter offsets. For example, for the CMD configuration, a pitch variation of  $2^\circ$  (which corresponds  
235 to a height variation of 7 cm for the Tx coil, 3 cm for Rx 1.5 meter offset, and  $< 1$ cm for the Rx 2.5m  
236 meter offset) shows 4% and 2% changes, for the 1.5 meter and 2.5 meter offsets respectively (16%  
237 and 8% for  $10^\circ$ ). This is not 0% but can be considered as usual field errors. Moreover, the pitch is  
238 generally changing smoothly from sounding to sounding.

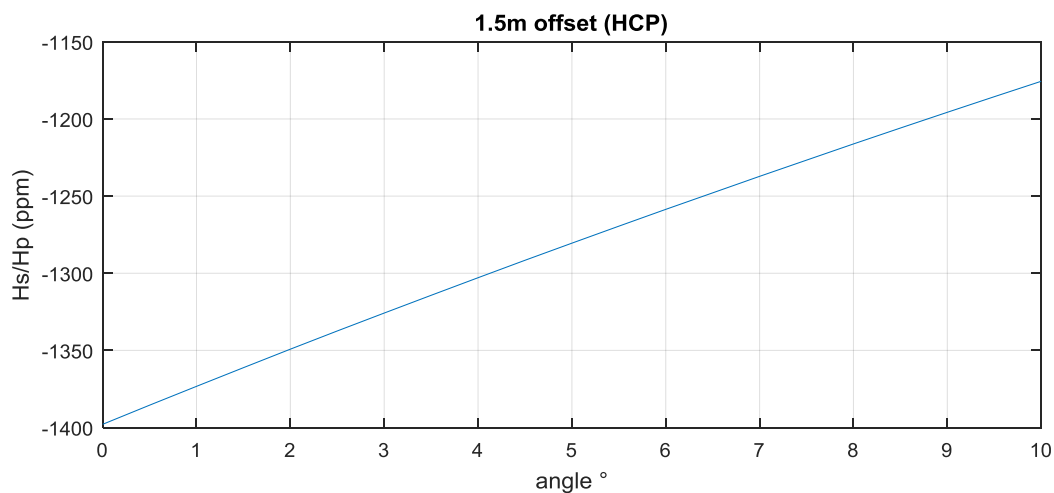

239

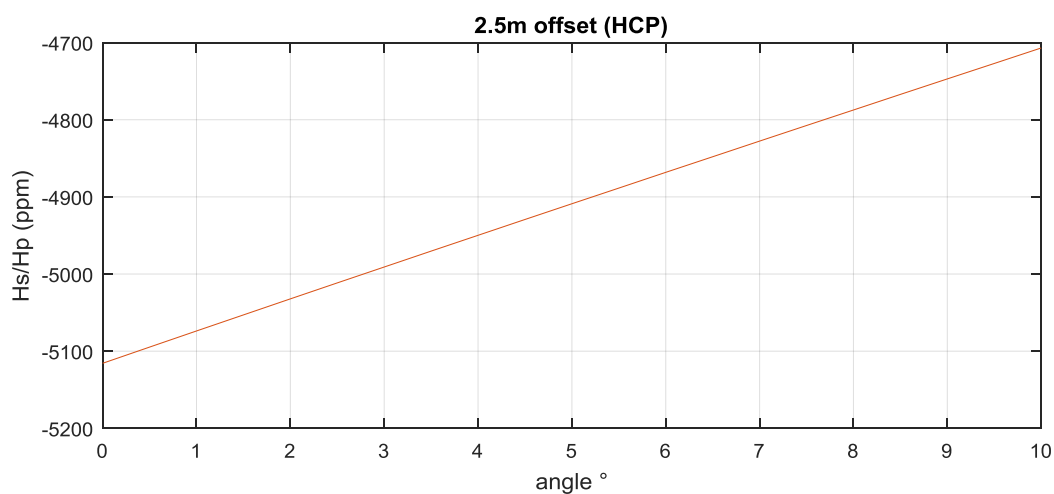

240

241

242 L244: Once calibration is done... Done.



243 L252-265: "Step (3) does not guarantee that estimated interfaces will match the ERT interfaces 1) if  
244 the fixed/chosen resistivities are not correct, or 2) if EMI does not integrate the ground in the same  
245 way as the ERI in case of strong anisotropy, which seems not to be the case here, since a good match  
246 is obtained."

247 The correlation coefficients are comprised between 0.5 and 0.7. Such values can be explained by  
248 several sources of errors in the estimation of the EMI apparent conductivities along the reference  
249 profile: 1) the differences in the location between the EMI measurements used for the calibration and  
250 the ERI profile, 2) the fact that the one dimensional model used for the EMI modeling is extracted  
251 from the inversed 2D resistivity section, 3) the difference of sensitivity between the ERI and EMI data.  
252 The regressions indicate the need of a stronger correction for the VCP configuration than for the HCP  
253 configuration. The scaling correction decreases as a function of offset, particularly for the HCP, which  
254 can be explained by the fact that small offsets are more sensitive to positioning and orientation  
255 errors, as well as natural near-surface variabilities.

256 Based on the correlation coefficients it is hard to say that a good match is obtained. The correlation  
257 isn't that high (i.e. it does indicate anisotropy). This is also visible in the VCP configuration, which is  
258 more influenced (compared to the HCP conf.) by the anisotropy (also due to the 1 m instrument  
259 operation height). The VCP configuration has a highly concentrated sensitivity close to the instrument  
260 compared to the HCP which reaches this high sensitivity (in 1D) at a lower point (more spread  
261 compared to the VCP). This results in an increasing correlation for bigger coil separations (due to a  
262 smaller relative impact on the response of the present anisotropy).

263 We agree it is a coarse match. The primary reason is that the EMI performed on the reference profile  
264 have been extracted from perpendicular cross lines: the idea of calibration from ERI, has come  
265 afterwards.

266 But comparing to Lavoué's *et al.* (2010) data, where an EMI profile has been specifically acquired for  
267 the calibration, the dispersion is of **the same order** (unfortunately no correlation coefficients  
268 provided). It is not perfect, and linear correlation is, as expected, more difficult to obtain for the  
269 smallest offsets for which exactitude of the measurement locations of the 2 methods is more critical  
270 (and the different integrated ground volumes by the 2 methods are more sensitive to small scale  
271 changes). But despite this, Figure 5 shows that the interface from the EMI inversion better matches  
272 the ERI all along the profile after calibration, especially for VCP, while calibration has a minor effect  
273 on the HCP results.

274 L271-273: Consequently, a three-layer model seems reasonably justified all over the site during the  
275 inversion process to represent the studied area: a resistive topsoil, a conductive clayey filling, and a  
276 resistive sand/gravel layer.

277 Is it justifiable to use a 3-layered model for the inversion after you calibrated the EMI data using a '2-  
278 layered' model, i.e. the inverted ERI results?

279 See response to Rev#2 lines 95-107 of this reply.

280

281 *Shouldn't the ERI spacing be adjusted such that the small top layer can be detected? (Like in the*  
282 *western part). Yes. Next time, it would be clearly an asset to do some additional small-offset ERI to*  
283 *evaluate the very near surface resistivity. Text will be annotated.*

284 *Maybe discuss the characteristics of the sensitivity distribution of the ERI array setup? Discussion will*  
285 *be added, regarding also the multigradient configuration.*

286 *L844-286: Maybe use the abbreviation SRMR (or SRSR?) to indicate the standardized root-*  
287 *meansquared residual and then also in the formula (L286): SRMR = ... Will be done.*

#### 288 *4- EMI INVERSION RESULTS AND DISCUSSION*

289 *Overall, I think there should be an increased focus on explaining why something is occurring and on*  
290 *the validation of the inversion.*

291 *I think it would be an asset to show the 2D slices of the inverted EMI data on the location of the*  
292 *reference ERI profile. This could provide a means of comparing the inversion results of both*  
293 *techniques. Actually, it is the case in Fig 5, where the position of the clay-substratum interface from*  
294 *the EMI inversion before and after calibration is shown. Showing a full 2D slice for the EMI inversion*  
295 *results is not pertinent as the resistivities are fixed during the inversion and the thicknesses of the*  
296 *first two layers inverted only.*

297 *"L333-335: The combined HCP&VCP data inversion naturally leads to the occurrence of higher values*  
298 *of data residual, than in the case of the individual HCP or VCP inversions."*

299 *Why is this the case? Because, at least theoretically, you add extra information into the inversion*  
300 *process.*

301 *The data residual is a quantitative assessment on how the model "explains" mathematically the data.*  
302 *Theoretically, comparison between data-residuals should be done for a single dataset. In the present*  
303 *case: a) the two measurements in HCP and VCP modes have been carried out in 2 times => not*  
304 *perfectly identical positions, heights and orientations a bit different for both data sets, b) HCP and*  
305 *VCP modes do not integrate the ground in the same way. If the ground within the footprint of the*  
306 *system is a bit far from a tabular model, then the interpretation with local 1D models can be more*  
307 *difficult with both data sets inverted jointly than with one of the two sets only.*

308 *Conclusion will be annotated.*

309

310 *Is this the best approach? Should they be inverted together? Or both separately and use them in a*  
311 *complementary way?*

312 *It depends on the characteristic size of the anomalies and variations that need to be mapped; using*  
313 *HCP, VCP or both brings specific information. Using both is a mean to mix information from both*  
314 *setup, but with a weighting depending of their respective sensitivity (i.e. DOI). Figure 8 illustrates the*  
315 *results of inverting HCP and VCP alone, and both at the same time. Two conclusions expected: 1) the*  
316 *near surface variability is inferred more accurately by VCP, 2) the low frequency variability is almost*  
317 *the same for all configurations.*

318 EMI results discussion will be annotated.

319

320 5- CONCLUSION

321 Overall, the limitations of the presented technique can be stressed more, as they are obviously  
322 present. Will be better highlighted.

323 L343-345: "In order to correct the sensitivity issues arising from EMI measurements, a calibration  
324 procedure was implemented, based on the use of a linear correction with ERI inversion results and  
325 auger soundings."

326 These aren't sensitivity issues, but drift and factory calibration issues. Text will be modified  
327 accordingly.

328 L360-362: This is unnecessary to mention, it is more a future practical goal based on specific  
329 information regarding the institutional framework of the research. Research programs have to be  
330 mentioned in acknowledgements, not in the body of the paper. Will be removed.

331 \_\_\_\_\_

332

333 **Rev#3**

334 *Dear Authors and Editor,*

335 *This paper presents a case study for testing the utility of multiconfiguration EMI surveys to*  
336 *characterize the internal structure of a representative paleochannel in an alluvial plain setting of the*  
337 *river Seine, France. There is a growing interest in using near-surface EMI techniques for mapping*  
338 *relict geologic features, such as; paleochannels, towards improving our understanding of how these*  
339 *features influence groundwater dynamics as well as how they control the development and evolution*  
340 *of the modern landscape. The results from this study show an interesting application of EMI, ERI, and*  
341 *auger soundings to map the internal structure of a paleochannel. However, I think there are several*  
342 *key pieces that are missing regarding the link between methods and the “bigger picture” attempting*  
343 *to understand the long-term hydrological processes. Thus, it is my opinion that the paper is*  
344 *incomplete in its present form, but could improve if there is more emphasis on the main*  
345 *considerations I have outlined below. I have made comments and questions throughout the*  
346 *manuscript, roughly following the order of the paper, which should be considered as suggestions for*  
347 *helping to improve the paper.*

348 *Main considerations:*

349 *1) In the abstract, the authors state that “A detailed knowledge of the internal heterogeneities*  
350 *of such paleomeanders can thus lead to a comprehensive understanding of its long-term*  
351 *hydrogeological processes.” Similar statements are made in Lines 44-48, however, the*  
352 *findings of this study are not described within a framework of how EMI, when calibrated with*  
353 *ERI and auger soundings, contributes to a better understanding of the hydrological processes*  
354 *of the river Seine alluvial plain “La Bassée.” I realize that the main focus of this paper is to*  
355 *map the internal geometry of the paleochannel, but I am left wondering why the authors*  
356 *make the above statements without any discussion throughout the paper? The authors end*  
357 *(Lines 358-362) by stating that their technique “could significantly improve the accuracy of*  
358 *hydrological modeling...” but this will be debated later (it is unclear whether this is another*  
359 *phase of the project, conference?). It is my opinion that this is a critical piece that is missing*  
360 *from the paper. Without this important discussion, the paper is missing a key aspect of how*  
361 *EMI methods provide an innovative way of characterizing the geological controls on*  
362 *hydrologic processes, and as a result, falls short of satisfying the aims and scopes of the*  
363 *journal [http://www.hydrology-and-earth-system-sciences.net/about/aims\\_and\\_scope.html](http://www.hydrology-and-earth-system-sciences.net/about/aims_and_scope.html).*

364 **Ok.**

365 **A discussion will be added concerning the impact on the EMI results of the water table in the**  
366 **present context. In a near-surface “clayey” context, resistivity methods are less sensitive to pore**  
367 **water content. In addition, when the upper formation is quite thin (less than half the ERI**  
368 **electrode spacing) and because the clayey infilling is always saturated, the influence of the water**  
369 **table on the loam/topsoil resistivity is hardly detectable.**

370 **Hydrogeological modeling is not proposed here, but planned by our colleague hydrogeologist. It**  
371 **will be limited by our (geophysicist) capability to set a relationship between the electrical**  
372 **properties and in the present case the water, clay and salinity contents (even mineralogy**  
373 **proportion). Text will be annotated accordingly.**

374 *Why didn't the survey go beyond the expected boundaries of the channel, visible in the LiDAR*  
375 *data? In other words, the surveys were only performed within the channel, making it difficult to*  
376 *fully characterize the variations in lithology/hydrology inside and outside the channel. Although*  
377 *vegetation cover (treeline) seems to be one limiting factor for the survey design, based on the*  
378 *LiDAR map, it seems feasible that the survey could have extended further to better capture the*  
379 *transition between outside and inside the paleochannel.*

380 **Not only treeline but also: 1- cultivated area, 2- unauthorized access to private fields, 3- ERI / EMI**  
381 **survey to manage sequentially and just 3 days to perform all the campaign.**

382 *The structure of the paper in the Methods and Results/Discussion sections is confusing. There is a*  
383 *mixing of methods and results in the Methods section, and nearly all of the results and figures are*  
384 *presented in the Methods section, with no figures presented in the Results/Discussion section, which*  
385 *is only two pages long? If the authors can 1) restructure the Methods, and Results/Discussion*  
386 *sections, 2) incorporate a more in-depth discussion of the hydrologic influences on the EMI*  
387 *measurements, water table information, weather conditions, and survey design, and 3) relate the*  
388 *results of the EMI surveys to how the "estimation of the geometry of the Seine river can provide*  
389 *valuable insight into its paleo-hydrology..." then they will have a paper that is beneficial for*  
390 *geologists, geophysicsts, and hydrologists interested in these complex problems.*

391 **Ok. The structure of the paper will be modified and better balanced with a discussion focused on the**  
392 **theoretical impact of the water content as well as the hydro-modeling perspective as suggested.**  
393 **Water table values in some of the hand auger soundings as well as the water conductivity (recorded**  
394 **in a nearby piezometer) will be discussed.**

395 **Concerning the point 3), it will be first reminded that without a clear link between geophysical and**  
396 **dating data it will be difficult to propose an accurate "past and future hydro-scenarios".**

397 **Below, an updated table of content:**

|     |                                               |
|-----|-----------------------------------------------|
| 398 | <b>1 – Introduction</b>                       |
| 399 | <b>2- Description of the study area</b>       |
| 400 | <b>3 – Field survey and measurement setup</b> |
| 401 | <b>3.1 ERI and auger sounding results</b>     |
| 402 | <b>3.2 EMI survey and calibration</b>         |
| 403 | <b>3.3 EMI inversion parameters</b>           |
| 404 | <b>3.4. EMI results</b>                       |
| 405 | <b>3.4.1 General trend</b>                    |
| 406 | <b>3.4.2 Internal variability</b>             |
| 407 | <b>5. Discussion 18</b>                       |
| 408 | <b>6- Conclusion 20</b>                       |

409  
410 *Specific comments/suggestions:*

411 *Abstract:*

412 *- Lines 23-25: As stated above, there is no discussion about this later in the paper and how the*  
413 *methods used in the present study can help address this important problem. Ok. Discussion will be*  
414 *added.*

415 *Introduction:*

416 - *In general, the Introduction is not referenced enough (e.g., Lines 34-37; 54-63; 64-72). There are*  
417 *several other studies that have looked at very similar problems that the current paper is trying to*  
418 *address, and should be cited. For example, please refer to Fitterman et al. (1991); Maillet et al.*  
419 *(2005); De Smedt et al. (2011), which also used similar procedures to investigate paleochannel*  
420 *geometry, thickness, etc. Ok. The literature concerning EMI in general, even for the lone paleo*  
421 *environment mapping is huge. De Smedt, Fitterman, Delefortrie, and Huang will be added.*

422 - *Line 39: I suggest defining electrical conductivity as:  $\sigma$ , and apparent conductivity as:  $\sigma_a$ , and use*  
423 *this notation consistently throughout the manuscript. In fact, apparent electrical conductivity (Lines*  
424 *50-51) is mislabeled (not  $\sigma$  as stated) and should be  $\sigma_a$ . Text will be modified with EC , EC<sub>a</sub>*

425 - *Line 40: Fine sediments do not necessarily correspond to conductive, and coarse sediments to*  
426 *resistive materials. Fine and coarse sediments that consist of the same mineralogy (e.g., quartz)*  
427 *should in principle have similar resistivities. What is missing here is that the mineralogy, quartz, clay,*  
428 *etc. is also an important property. In addition, the porosity and fluids within the pore space, whether*  
429 *freshwater or saline water, also have an important influence on  $\sigma$ . This needs to be clarified. Ok. Text*  
430 *will be annotated.*

431 - *Lines 44-48: Similar to my above comment for the Abstract. The idea that EMI can be used to*  
432 *provide valuable insight into the paleo-hydrology and as the author's state, climatic fluctuations, does*  
433 *not come out later in the discussion of the paper. Text will be annotated as suggested.*

434 - *Line 51: "over a large surface," or is it that EMI methods are capable of covering large*  
435 *areas/distances over relatively short periods of time? Text will be annotated as suggested.*

436 - *Lines 54-63: There are no references in this paragraph, and citations are needed as this information*  
437 *regarding the background EM physics is probably not general knowledge to the reader. Ok reference*  
438 *will be added.*

439 - *Line 61: This should be "respectively, imaginary and real" Ok*

440 - *Line 63: I haven't seen this term used before in the literature: "apparent depth of investigation," and*  
441 *have only seen it reported as the depth of investigation (DOI), see Huang, (2005), and references*  
442 *therein. Will be corrected.*

443 - *Lines 67-70: I think a fourth point to add is that the DOI is also a function of the height of the*  
444 *instrument above the ground. Ok.*

445 - *Line 78: What are "typical conductive properties"? Perhaps give a few examples here. Low*  
446 *ferromagnetic...text will be modified.*

447 *Description of the study area:*

448 - *What is missing from this section is a description of any information on the depth of the water table,*  
449 *as this is important for data processing and interpretation. Information will be provided, as well as*  
450 *discussion concerning the impact of the water table.*

451 - Lines 105-107: This is already stated in lines 47-48, and could either be removed or combined with  
452 the earlier statement in the Introduction. **Ok. Reference will be moved to the introduction.**

453 - Line 116: What kind of soundings? Borehole soundings from a hand auger? **Mechanical not hand**  
454 **borehole soundings reaching between 6 and 10m depth. Text will be modified accordingly.**

455 - Line 138: Please change “this” to “these” **Ok**

456 - Line 144: This sentence should be referenced **Ok.**

457 - Lines 145-149: This last paragraph seems a bit out of place in the Study Area section. The objectives  
458 of the study should be listed in the last paragraph of the Introduction. **Ok**

459 *Methodology, Measurement setup:*

460 - Overall, I am surprised to see that most of the results and nearly all of the figures are discussed in  
461 the Methods section and not the Results section? It is confusing to the reader and I am left wondering  
462 why the authors chose to structure the paper in this way? I think the clarity of the paper could be  
463 improved if the basic background of the methods is described in the Methods subsections, and the  
464 results be left for the Results/Discussion section. In fact the Results/Discussion section is only 2 pages  
465 long, compared to 6 pages of Methods! **Structure of the paper will be modified as suggested. See the**  
466 **new outlines L412-422 of the present reply.**

467 - Line 153: Please provide the details of where you got the LiDAR map, i.e., what database, the dates  
468 of data collection, how it was produced, etc. Also include a citation. **The LiDAR map was provided by**  
469 **the Seine Grands Lacs public organism (<http://seinegrandslacs.fr/>) to the PhD thesis of B.**  
470 **Deleplancque referenced in the current paper.**

471 - Lines 155-157: This sentence is repeated in Line 162, and is Line 158 intended to be a separate  
472 paragraph, or part of the same paragraph? **Ok. Text will be modified.**

473 - Lines 162-164: Electromagnetic induction (EMI) is already spelled-out before, and I don’t think it is  
474 necessary to write ElectroMagnetic (EMI); Horizontal CoPlanar – HPC, and Vertical CoPlanar – VCP,  
475 like this. In other words, I don’t think it is necessary to capitalize the beginning of each abbreviation  
476 as this is already common knowledge in the literature, i.e., electromagnetic induction (EMI), not  
477 ElectroMagnetic Induction. **Ok.**

478 - Line 167: What is the approximate DOI for each offset? It would be useful to include this instead of  
479 just saying “a distinct DOI.” **Ok. Approximate values of DOI will be mentioned.** Additionally, it would  
480 be helpful to mention what the instrument height above the ground was, as well as what the step-size  
481 was (e.g., 0.5 m), what was the acquisition mode (stationary/fixed spacing, continuous mode,  
482 random walk). In other words, what were the specific survey details used in this study? Also, what is  
483 missing here is a description of the weather conditions, and how long the surveys were performed,  
484 when they were performed, as these are also important for the reader to understand what the  
485 conditions were during data acquisition. Will be **done.**

486 - Line 168: Why were “slightly different sampling intervals used”? This needs to be explained.  
487 Shouldn’t the sampling intervals be the same if the intention is to compare different dipole  
488 configurations at the same acquisition point? **Acquisition was made with the continuous mode (0.6 s**

489 time step, walking at approximately 2-3m/s). 1) In continuous acquisition the instrument can be used  
490 for a single orientation at a time, 2) the survey was performed with GPS, 3) we faced GPS reception  
491 issues. Consequently the walking paths are not the same for each orientation (Fig 3). Text will be  
492 annotated.

493 - Line 170: Please change “attempting to merge” to “merging” as attempting to do something implies  
494 that you were not able to do it. Ok.

495 Auger sounding results:

496 - Much of this section is results and not methods. Is it possible to briefly summarize the methods that  
497 you used for the auger sounding here and present the results in the Results section? This also follows  
498 for the other subsections in the Methods section, which are a mix of methods and results. Ok.  
499 Structure of the paper will be modified. See the new outlines L412-422 of the present reply.

500 - Line 183: Missing PTA 06, as this also contains a peat layer according to Figure 4. Ok.

501 ERI results:

502 - Again, much of this section is mixing methods with results.

503 EMI calibration from ERI:

504 - Have the authors performed any other site-specific calibrations such as; instrument drift,  
505 temperature effects, topographic effects? These have been shown to be important for data  
506 processing (see Sudduth et al., 2001; Delefortrie et al., 2014) and is not discussed in the current study.  
507 No additional calibration has been done. But concerning the quadrature part, the CMD instrument  
508 drift due to temperature is not significant with this instrument for usual daily variations (+ or – 10°C).  
509 This not the case for the in-phase part, not presented here.

510 - Line 207: “near surface” should be hyphenated “near-surface” Ok.

511 - Lines 217-222: This is a similar to what was already described in the Auger sounding results section  
512 and can either be removed, or combined with Lines 175-183. Ok.

513 - Line 241: Please change “developed in Schamper et al” to “developed by Schamper et al” Ok.

514 - Line 244: Please change “once the calibration done” to “once the calibration is done” Ok.

515 - Line 246: Please remove “Actually” at the beginning of the sentence, and start with “Despite” Ok.

516 - Lines 250-251: “All those non-straightforward steps...” I would suggest rewording the start of this  
517 sentence and remove “non-straightforward” The sentence will be modified accordingly.

518 Inversion parameters:

519 - Line 270: Please remove the word “clearly” Ok.

520 - Lines 280-281: As mentioned above, the instrument height should be mentioned earlier in the paper.  
521 Will be done.



522 - Lines 284-286: An equation sign is missing, e.g.,  $RMSE = \dots$ , also there is no equation number  
523 assigned to this equation (1) on the right-hand side of the margin. Please check the journal  
524 formatting for equations. **Ok**

525 - Lines 289-290: Is this sentence meant to be a standalone paragraph? This information is also listed  
526 in the Figure 8 caption (Lines 480-482). **Text will be reformatted.**

527 *EMI inversion results and discussion, General trend:*

528 - Lines 294-295: The introductory sentence is a standalone paragraph? Is this a formatting error when  
529 Line 296 should be a continuation of the same paragraph? Also, same comment for Lines 307-308.  
530 **Text will be reformatted.**

531 *Conclusion:*

532 - Lines 341-342: Please delete "(CMD explorer from GF instruments," as this is already mentioned  
533 earlier in the paper. Will be **done**.

534 *Figures:*

535 - Figure 1, Line 441: In the bottom panel, is the study area highlighted by the small red star on the  
536 figure? It would be helpful to either enlarge location start, or show a boxed area where the surveys  
537 were performed to help the reader easily locate the study site. Additionally, for the figure caption  
538 there is a typo: "maps" should be uppercase "Maps," and add the word "bottom" after "plain" to  
539 denote the top vs. bottom panels. **Ok.**

540 - Figure 2, Line 443: Please change "studied area" to "study area". **Ok.**

541 - Figure 3: It would be helpful to show where the locations of the auger soundings were performed  
542 with respect to the geophysical surveys Will be **done**.

543 - Figure 4, Line 454: Please change "log" to uppercase "Log" to begin the sentence. **Ok.**

544 - Figure 5, Line 460: Please remove the word "clearly" Will be **done**.

545 - Figure 7, Line 473: Please change "histogram" to uppercase "Histogram" Will be **done**.

546 *Best Regards*

547 *References:*

548 *De Smedt, P., Van Meirvenne, M., Meerschman, E., Saey, T., Bats, M., Court-Picon, M., De Reu, J.,*  
549 *Zwertvaegher, A., Antrop, M., Bourgeois, J. and De Maeyer, P., 2011. Reconstructing palaeochannel*  
550 *morphology with a mobile multicoil electromagnetic induction sensor. Geomorphology, 130, 136-141.*

551 *Delefortrie, S., De Smedt, P., Saey, T., Van De Vijver, E., Van Meirvenne, M., 2014. An efficient*  
552 *calibration procedure for correction of drift in EMI survey data. Journal of Applied Geophysics, 110,*  
553 *115-125.*

554 *Fitterman, D.V., Menges, C.M., Al Kamali, A.M. and Jama, F.E., 1991. Electromagnetic mapping of*  
555 *buried paleochannels in eastern Abu Dhabi Emirate, UAE. Geoplotation, 27, 111-133.*

- 556 *Huang, H., 2005. Depth of investigation for small broadband electromagnetic sensors: Geophysics, 70*  
557 *(6), G135–G142.*
- 558 *Maillet, G.M., Rizzo, E., Revil, A. and Vella, C., 2005. High resolution electrical resistivity tomography*  
559 *(ERT) in a transition zone environment: application for detailed internal architecture and infilling*  
560 *processes study of a Rhône River paleo-channel. Marine Geophysical Researches, 26, 317-328.*
- 561 *Sudduth, K. A., Drummond, S. T., Kitchen, N. R., 2001. Accuracy issues in electromagnetic induction*  
562 *sensing of soil electrical conductivity for precision agriculture. Computers and electronics in*  
563 *agriculture, 31, 239-264.*
